# Supplementary material for: A scalable strategy toward compliant tandem yarn-shaped supercapacitors with high voltage output
Source: Royal Society of Chemistry journal article supplement (doi:10.1039/d1ta02328d), 2021-01-01
Supplement: d1ta02328d6.pdf [file d1ta02328d6.pdf]

## Supporting Information

### **A scalable strategy toward compliant tandem yarn-shaped supercapacitors with high voltage output**

Juan Zhang<sup>a</sup>, Qingli Xu<sup>a</sup>, Xiangyu Qian<sup>a</sup>, Xinhou Wang<sup>ab\*</sup>, Kun Zhang<sup>a\*</sup>

<sup>a</sup> *Key Laboratory of Textile Science & Technology (Donghua University), Ministry of Education, College of Textiles, Donghua University, Shanghai 201620, China*

<sup>b</sup> *College of Mechanical Engineering, Donghua University, Shanghai 201620, China*

E-mail address: [kun.zhang@dhu.edu.cn](mailto:kun.zhang@dhu.edu.cn) (Kun Zhang); [xhwang@dhu.edu.cn](mailto:xhwang@dhu.edu.cn) (Xinhou Wang)

#### **Contents**

**Supplementary Note 1.** Calculation of contact resistance

**Supplementary Figure 1.** Preparation of MnO<sub>2</sub>/GO nanohybrid slurry

**Supplementary Figure 2.** A typical SEM image (a) and TEM image (b) of GO

**Supplementary Figure 3.** TGA curves of pure MnO<sub>2</sub> and all MnO<sub>2</sub>/rGO composites.

**Supplementary Figure 4.** Cross-sectional SEM images of rGO electrode (a) and MnO<sub>2</sub>/rGO<sub>(1:1)</sub> electrode (b)

**Supplementary Figure 5.** Diameters of YSSC electrodes versus mass loading of MnO<sub>2</sub>/rGO<sub>(1:1)</sub>

**Supplementary Figure 6.** Stress-strain curves of MnO<sub>2</sub>/rGO<sub>(1:1)</sub> based T-YSSCs

**Supplementary Figure 7.** (a) Photograph of ESF-A bending at 180°. (b) Photograph of ESF-B winding at 360°.

**Supplementary Figure 8.** CV curves of YSSC and devices consisting of 3, 5, 10

YSSCs connected in parallel, which are measured at a scan rate of 5 mV/s.

**Supplementary Table 1.** Total resistance for T-YSSCs and MI-YSSCs

## Supplementary Note 1

**Calculation process of contact resistance.** In theory, the total resistance  $R_n$  for T-YSSCs consisting of different unit numbers (n) are composed of different components:

$$\begin{aligned}R_1 &= R_i + R_{ct} \\R_2 &= 2R_i + R_{ct} + R_{lt} \\&\dots \\R_n &= nR_i + R_{ct} + (n-1) R_{lt} \\ \Delta R_{T\text{-YSSCs}} &= R_n - R_1 = (n-1) (R_i + R_{lt})\end{aligned}\quad (1)$$

Where  $R_i$  is internal resistance for single YSSC,  $R_{ct}$  is contact resistance between  $\text{MnO}_2/\text{rGO}_{(1:1)}$  electrode and metal (current collector or metal wire) and  $R_{lt}$  is the resistance generated from T-YSSCs interconnection. As the unit number increases,  $R_{ct}$  will not increase since no more contact between  $\text{MnO}_2/\text{rGO}_{(1:1)}$  electrode and metal generates.

Correspondingly,  $R_n$  for MI-YSSCs consists of following components:

$$\begin{aligned}R_1 &= R_i + R_{ct} \\R_2 &= 2(R_i + R_{ct}) + R_{lt} \\&\dots \\R_n &= n(R_i + R_{ct}) + (n-1)R_{lt} \\ \Delta R_{\text{MI-YSSCs}} &= R_n - R_1 = (n-1) (R_i + R_{ct} + R_{lt})\end{aligned}\quad (2)$$

$R_{ct}$  of MI-YSSCs will increase with the unit number due to metal-wire connections.

Therefore, the  $R_{ct}$  value will be calculated from this formula:

$$\Delta R_{\text{MI-YSSCs}} - \Delta R_{T\text{-YSSCs}} = (n-1) R_{ct}\quad (3)$$

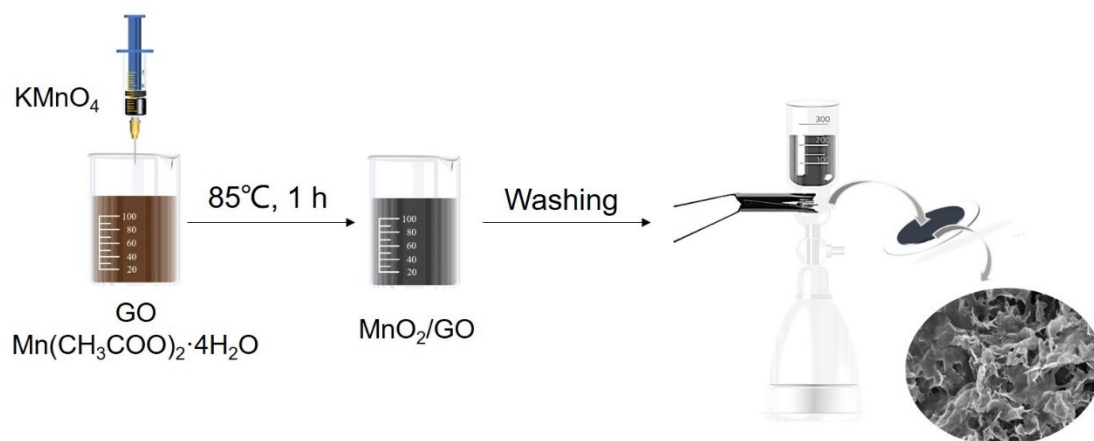

**Figure S1.** Preparation process of MnO<sub>2</sub>/GO nanohybrid slurry.

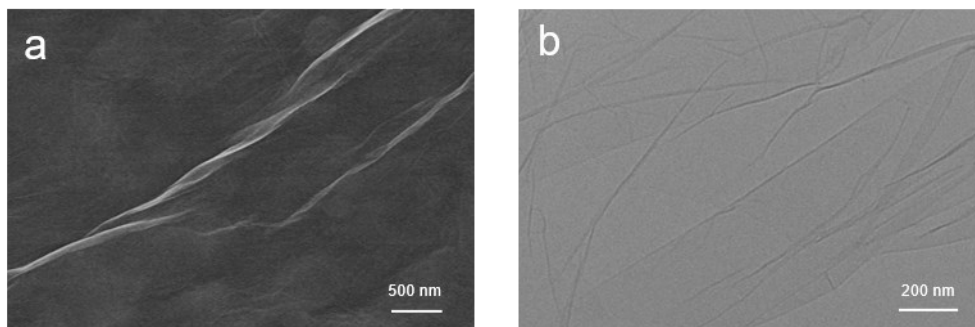

**Figure S2.** (a) A typical SEM image of GO. (b) A typical TEM image of GO.

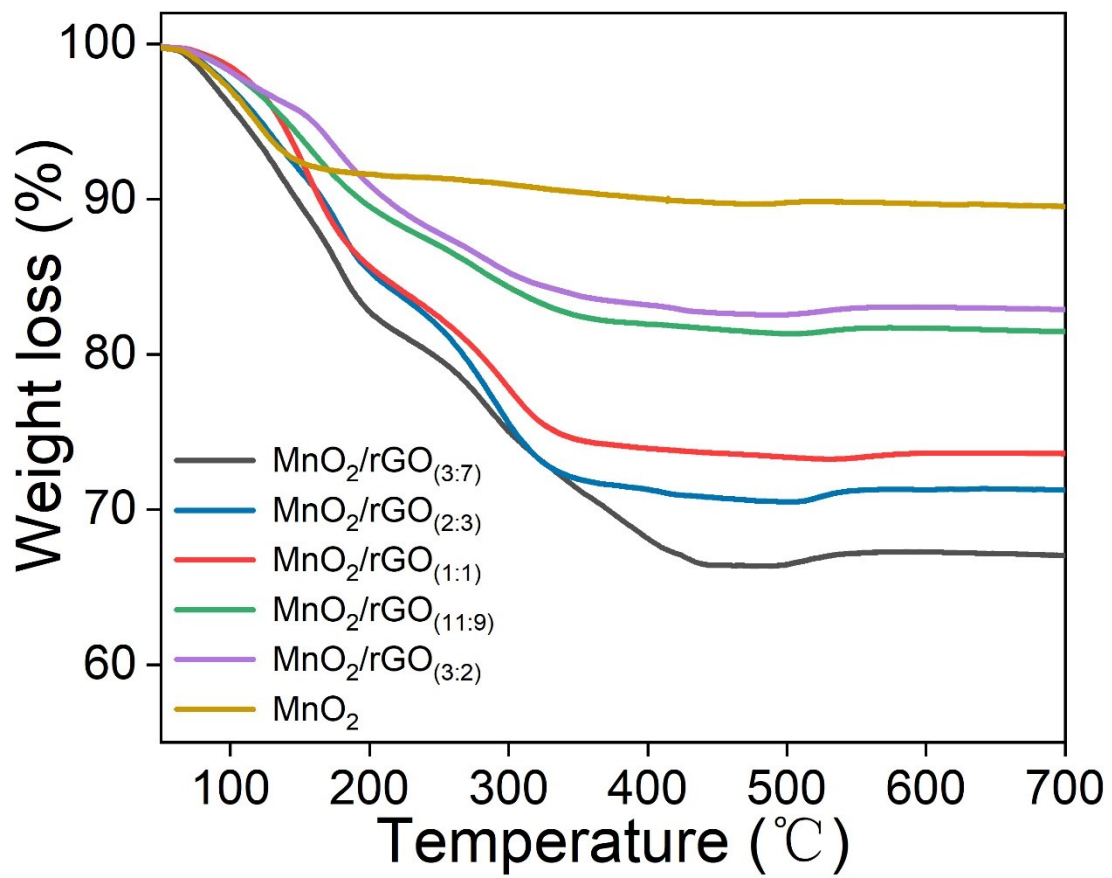

**Figure S3.** TGA curves of pure MnO<sub>2</sub> and all MnO<sub>2</sub>/rGO composites.

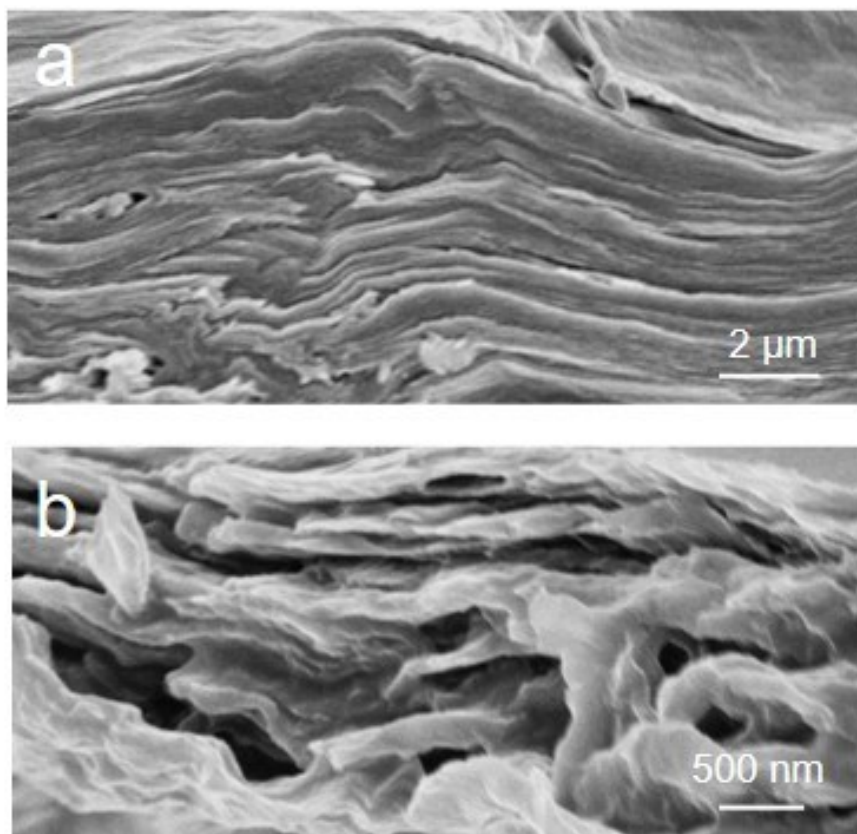

**Figure S4.** (a) Cross-sectional SEM image of rGO electrode. (b) Cross-sectional SEM image of MnO<sub>2</sub>/rGO<sub>(1:1)</sub> electrode.

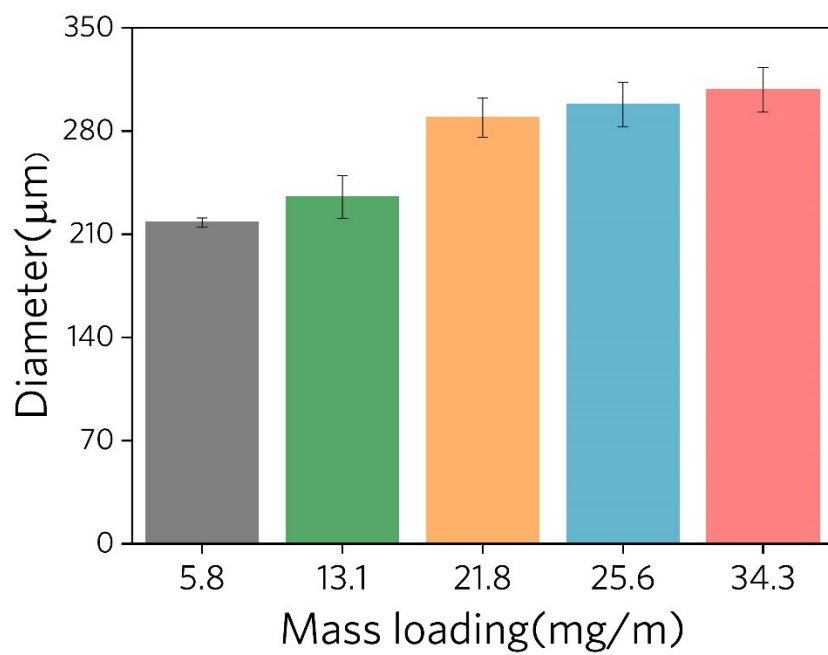

**Figure S5.** Plots of diameter of MnO<sub>2</sub>/rGO<sub>(1:1)</sub> electrode versus mass loading of active material (5.8-34.3 mg/m).



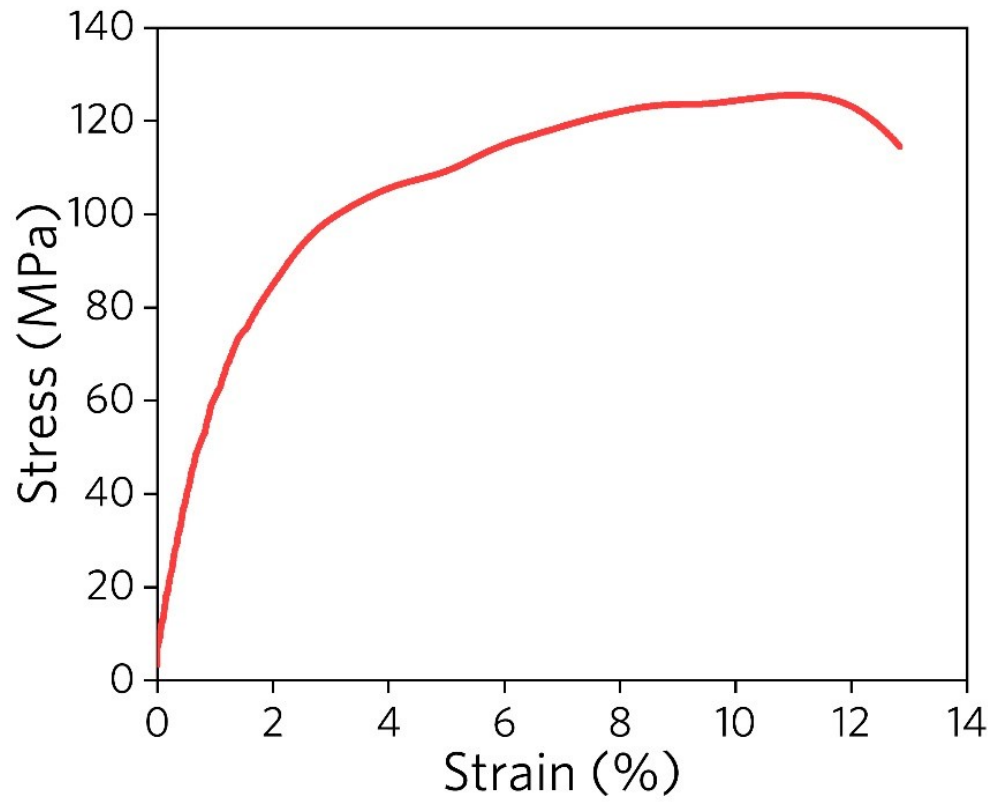

**Figure S6.** Stress–strain curves of MnO<sub>2</sub>/rGO<sub>(1:1)</sub> based T-YSSCs.

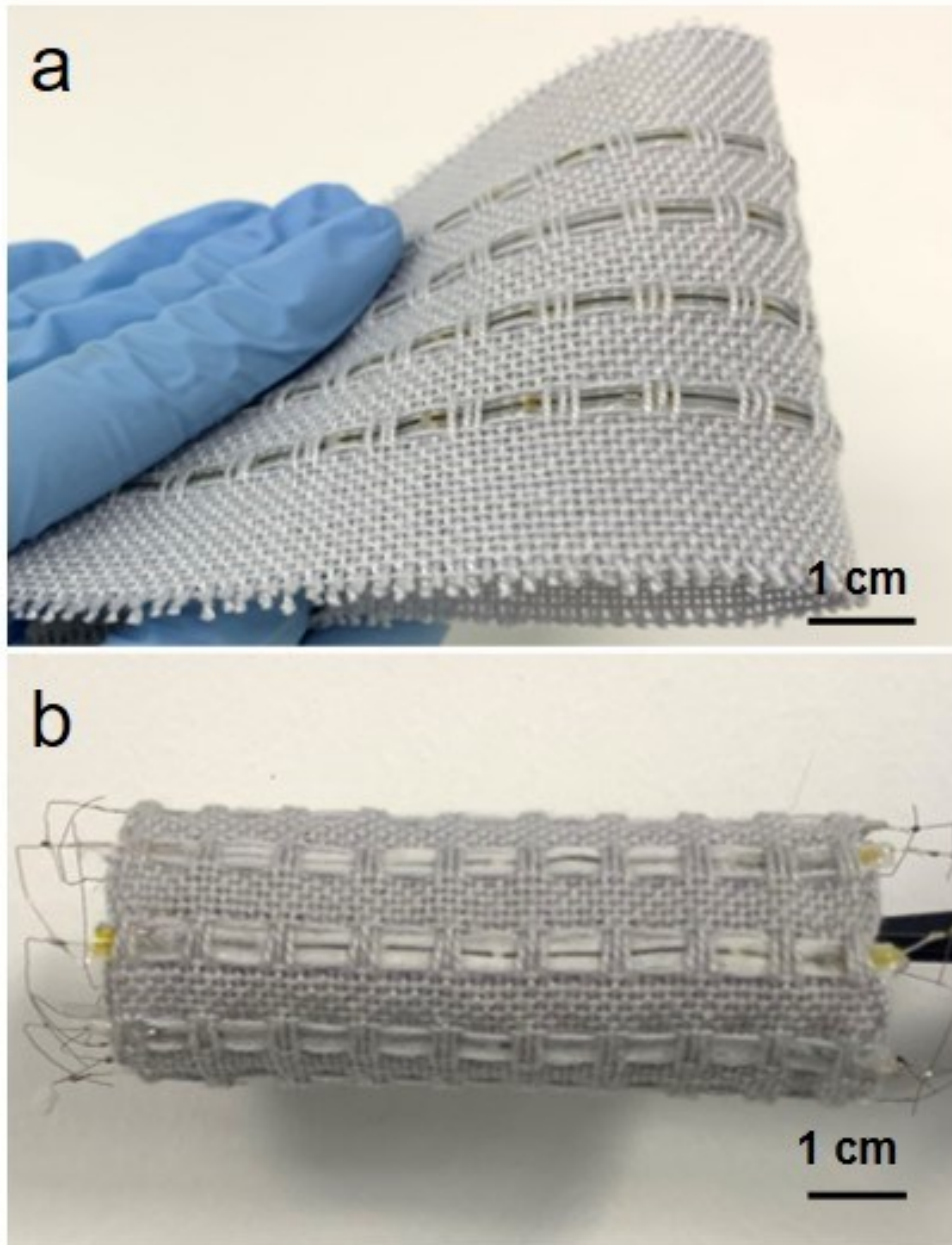

**Figure S7.** (a) Photograph of ESF-A bending at 180°. (b) Photograph of ESF-B winding at 360°.

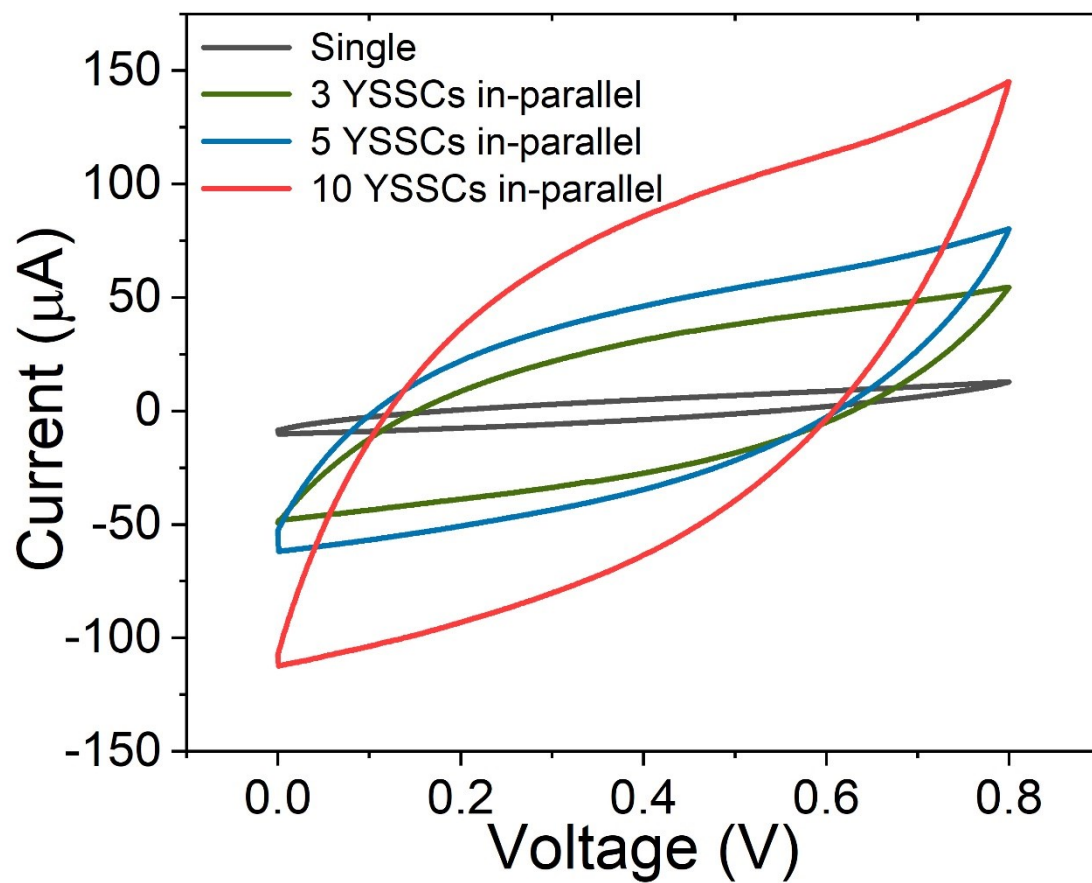

**Figure S8.** CV curves of YSSC and devices consisting of 3, 5, 10 YSSCs connected in parallel, which are measured at a scan rate of 5 mV/s.

**Table S1.** Total resistance for T-YSSCs and MI-YSSCs.

| Unit number                      | 1   | 3    | 5    | 10    |
|----------------------------------|-----|------|------|-------|
| $R_n$ for T-YSSCs (k $\Omega$ )  | 6.7 | 21.2 | 33.9 | 88.5  |
| $R_n$ for MI-YSSCs (k $\Omega$ ) | 6.8 | 32.2 | 54.6 | 122.8 |
